# Supplementary material for: Host adaptive mutations in the 2009 H1N1 pandemic influenza A virus PA gene regulate translation efficiency of viral mRNAs via GRSF1
Source: PubMed Central journal article supplement (PMC9576711; doi:10.1038/s42003-022-04082-5), 2022-10-17
Supplement: 42003_2022_4082_MOESM3_ESM.pdf [file 42003_2022_4082_MOESM3_ESM.pdf]

## Description of Additional Supplementary Files

**File name:** Supplementary Data 1

**Description:** The source data behind the graphs in the paper
